# Supplementary material for: Microplastic from beach sediment to tissue: a case study on burrowing crab Dotilla blanfordi
Source: PeerJ. 2024 Jul 12;12:e17738. doi: 10.7717/peerj.17738 (PMC11249004; doi:10.7717/peerj.17738)
Supplement: Supplemental Information 1 [file peerj-12-17738-s001.xlsx]

## Sheet: Sheet1
Serial number	Study site	Sample type	Abundnace (MPs/g)	Shape of microplastics			Colour of microplastics							Size of microplastics
				Fiber	Film	Fragment	Blue	Purple	Black	RED	Green	Pink	Trasnparent	1–2 mm	2–3 mm	3–4 mm	4–5 mm
1	Asharmata	Burrow sediment	1.3	230	70	117	201	10	55	19	6	81	45	88	135	108	86
2	Asharmata	Burrow sediment	1.15
3	Asharmata	Burrow sediment	0.966667
4	Asharmata	Burrow sediment	0.783333
5	Asharmata	Burrow sediment	0.983333
6	Asharmata	Burrow sediment	0.916667
7	Asharmata	Burrow sediment	0.85
8	Asharmata	Feeding pellet	0.483333	99	52	72	130	5	40	1	0	38	9	67	93	45	18
9	Asharmata	Feeding pellet	0.416667
10	Asharmata	Feeding pellet	0.566667
11	Asharmata	Feeding pellet	0.633333
12	Asharmata	Feeding pellet	0.616667
13	Asharmata	Feeding pellet	0.483333
14	Asharmata	Feeding pellet	0.516667
15	Asharmata	Crab tissue	0.4	45	22	38	69	2	14	0	2	16	2	73	30	1	1
16	Asharmata	Crab tissue	0.3
17	Asharmata	Crab tissue	2.7
18	Asharmata	Crab tissue	2
19	Asharmata	Crab tissue	1.8
20	Asharmata	Crab tissue	1.6
21	Asharmata	Crab tissue	1.7
22	Serena	Burrow sediment	2.58333	222	98	178	304	20	45	1	1	118	9	115	129	115	139
23	Serena	Burrow sediment	1.4
24	Serena	Burrow sediment	0.666667
25	Serena	Burrow sediment	1.3
26	Serena	Burrow sediment	0.9
27	Serena	Burrow sediment	0.616667
28	Serena	Burrow sediment	0.85
29	Serena	Feeding pellet	0.866667	107	78	98	187	4	28	1	0	58	5	63	88	72	60
30	Serena	Feeding pellet	0.833333
31	Serena	Feeding pellet	0.666667
32	Serena	Feeding pellet	0.683333
33	Serena	Feeding pellet	0.466667
34	Serena	Feeding pellet	0.55
35	Serena	Feeding pellet	0.65
36	Serena	Crab tissue	2.2	60	22	32	61	12	8	0	1	23	9	53	48	12	1
37	Serena	Crab tissue	1.5
38	Serena	Crab tissue	1.5
39	Serena	Crab tissue	1.8
40	Serena	Crab tissue	1.6
41	Serena	Crab tissue	1.6
42	Serena	Crab tissue	1.2
43	Mandvi	Burrow sediment	1.26667	246	99	178	289	36	42	8	2	132	14	161	167	123	72
44	Mandvi	Burrow sediment	2.35
45	Mandvi	Burrow sediment	1.18333
46	Mandvi	Burrow sediment	0.85
47	Mandvi	Burrow sediment	0.866667
48	Mandvi	Burrow sediment	0.983333
49	Mandvi	Burrow sediment	1.21667
50	Mandvi	Feeding pellet	0.783333	111	89	138	199	16	49	2	5	56	11	112	94	74	58
51	Mandvi	Feeding pellet	0.983333
52	Mandvi	Feeding pellet	1.03333
53	Mandvi	Feeding pellet	0.766667
54	Mandvi	Feeding pellet	0.516667
55	Mandvi	Feeding pellet	0.533333
56	Mandvi	Feeding pellet	1.01667
57	Mandvi	Crab tissue	5.1	47	77	97	119	10	20	3	0	61	8	135	67	14	5
58	Mandvi	Crab tissue	4
59	Mandvi	Crab tissue	4.6
60	Mandvi	Crab tissue	1.9
61	Mandvi	Crab tissue	3.1
62	Mandvi	Crab tissue	1.4
63	Mandvi	Crab tissue	2
